# Supplementary material
Source: HighWire-hosted journal article supplement (https://bmjopen.bmj.com/content/9/7/e026167)
Supplement: inline-supplementary-material-1 [file inline-supplementary-material-1.pdf]

## Search Strategy

### 1. Medline

- #1 "Hypertension"[MeSH]
- #2 "Quality Indicators, Health Care"[MeSH]
- #3 #1 AND #2
- #4 (English[lang] OR Indonesian[lang])
- #5 #3 and #4

### 2. Cochrane

- #1 MeSH descriptor: [Hypertension] explode all trees
- #2 MeSH descriptor: [Quality Indicators, Health Care] explode all trees
- #3 #1 AND #2

### 3. Scopus

- #1 hypertension OR hypertensive OR "high blood pressure\*"
- #2 "process indicator" OR "structure indicator" OR "process indicator" OR "quality indicator\*" OR "clinical indicator\*" OR "quality measure\*" OR "outcome indicator\*" OR "effectiveness indicator\*" OR "performance indicator\*" OR "structure indicator\*" OR "process indicator\*"
- #3 TITLE ( hypertension OR hypertensive OR "high blood pressure\*" )
- #4 EXCLUDE ( DOCTYPE , "le" ) OR EXCLUDE ( DOCTYPE , "no" )
- #5 LIMIT-TO ( LANGUAGE , "English" ) OR LIMIT-TO ( LANGUAGE , "Indonesian" )
- #6 #1 AND #2 AND #3 AND #4 AND #5
